# Supplementary material for: Attaching Onto or Inserting Into an Intramolecular Hydrogen Bond: Exploring and Controlling a Chirality-Dependent Dilemma for Alcohols
Source: MDPI journal article supplement (doi:10.3390/sym14020357), 2022-02-11
Supplement: s1 [file s1]

**Supporting Information:**

**Attaching onto or Inserting into an  
Intramolecular Hydrogen Bond:  
Exploring and Controlling a  
Chirality-dependent Dilemma for  
Alcohols**

M. Lange, E. Sennert, M. A. Suhm\*

E-mail: [msuhm@gwdg.de](mailto:msuhm@gwdg.de)

---

## Theoretical results

**Table S1:** Applied keywords in ORCA 4.2.1<sup>S1</sup> and Turbomole 7.3<sup>S2,S3</sup> for electronic structure optimizations (superscript ES), local energy decompositions (LED), reaction path optimizations (RP) and transition state searches (TS).

| Level of approximation                                       | Applied keywords                                                                      |
|--------------------------------------------------------------|---------------------------------------------------------------------------------------|
| B3LYP-D3(BJ, abc) / def2-TZVP<br>(ORCA) <sup>ES</sup>        | B3LYP D3BJ def2-TZVP abc grid5 NoFinalGrid UseSym<br>VERYTIGHTSCF TIGHTOPT FREQ       |
| DLPNO-CCSD(T)<br>(ORCA) <sup>LED</sup>                       | DLPNO-CCSD(T) TightPNO aug-cc-pVQZ aug-cc-pVQZ/C<br>TightSCF LED                      |
| B97-3c-D3(BJ, abc) / def2-TZVP<br>(TURBOMOLE) <sup>RP</sup>  | b973c def2-TZVP grid m5 disp3 bj abc ri                                               |
| B97-3c-D3(BJ, abc) / def2-mTZVP<br>(TURBOMOLE) <sup>TS</sup> | b973c def2-mTZVP grid m5 disp3 bj abc ri itrvec 1                                     |
| B3LYP-D3(BJ, abc) / def2-TZVP<br>(ORCA) <sup>TS</sup>        | B3LYP D3BJ def2-TZVP abc grid5 NoFinalGrid UseSym<br>OptTS VERYTIGHTSCF TIGHTOPT FREQ |

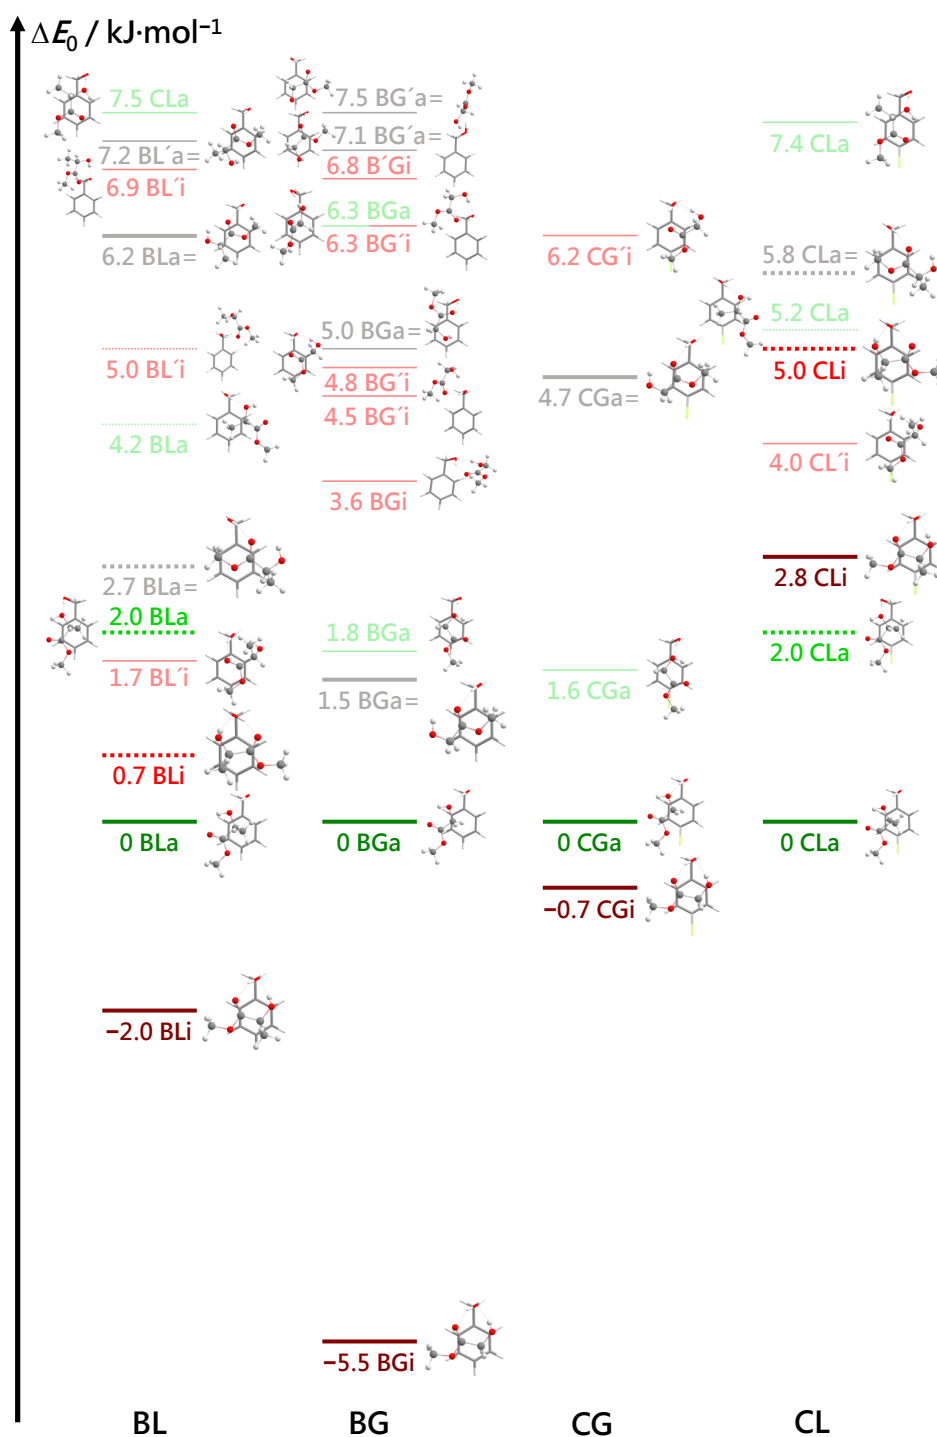

**Fig. S1:** Optimized structures of the four systems BL, BG, CG and CL and their vibrational zero point-corrected energy differences up to (at most)  $8 \text{ kJ}\cdot\text{mol}^{-1}$  above the respective most stable associated structure, which was chosen as reference point. Solid lines indicate hom structures in which the (*S*)-(-)-lactate induces a *gauche*(-) conformation in the alcohol, whereas het structures are marked with dashed lines. The lines do not imply structural similarity but rather best-in-class property. In structures that contain a prime in their name, the ester conformation or coordination deviates from the most stable structures (with the exception of 6.8 B'Gi, where the alcohol conformation deviates from the usually present *gauche* conformation). Associated structures with a hydrogen bond between the alcohol and the carbonyl oxygen are denoted by =.

(a)

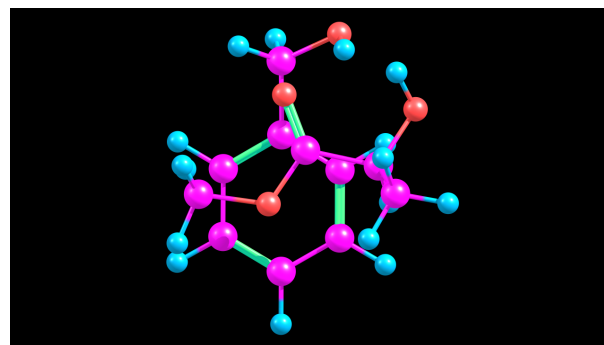

(b) 11.2 kJ·mol<sup>-1</sup>

(c)

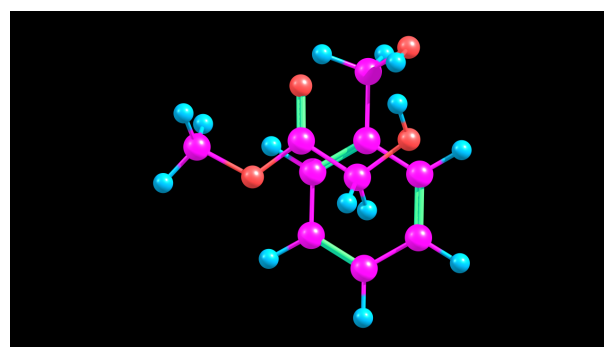

(d) 6.6 kJ·mol<sup>-1</sup>

(e)

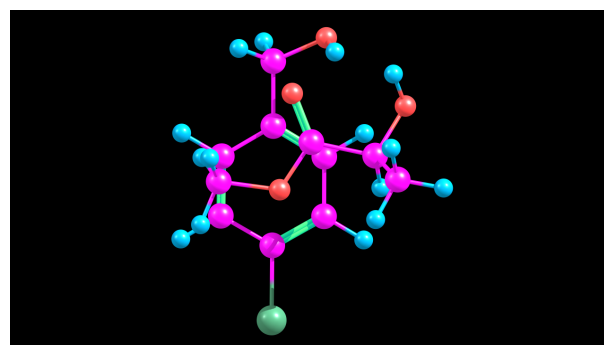

(f) 14.8 kJ·mol<sup>-1</sup>

(g)

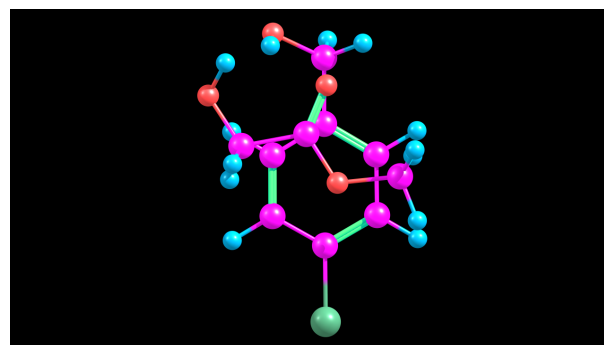

(h) 13.6 kJ·mol<sup>-1</sup>

**Fig. S2:** Left column: animated interconversion paths between the most stable associated complex and the most stable inserted complex for the four systems BL (a), BG (c), CL (e) and CG (g). Right column: transition states of the respective interconversion paths for the four systems BL (b), BG (d), CL (f), CG (h) and their vibrational zero point-corrected barrier heights, as viewed from the associated complex.

**Table S2:** Performance of the uniformly scaled harmonic wavenumber prediction  $\tilde{\nu}_{\text{calc}}$  for the experimental bands assigned in this work (upper part) and in previous investigations of alcohol(phenol) - hydroxyester complexes (lower part, P=phenol, M=methanol, N=(*S*)-2-naphthyl-1-ethanol) as well as the absolute values for the experimental and scaled harmonic band position and the calculated IR band strength.

| label<br>this work | mode                                 | $\tilde{\nu}_{\text{exp}}$<br>/cm <sup>-1</sup> | $0.97 \cdot \tilde{\nu}_{\text{calc}}$<br>/cm <sup>-1</sup> | calc. IR band strength<br>/(km/mol) | $(0.97 \cdot \tilde{\nu}_{\text{calc}} - \tilde{\nu}_{\text{exp}})$<br>/cm <sup>-1</sup> |
|--------------------|--------------------------------------|-------------------------------------------------|-------------------------------------------------------------|-------------------------------------|------------------------------------------------------------------------------------------|
| BLa                | OH <sub>B</sub>                      | 3503                                            | 3496                                                        | 406                                 | -7                                                                                       |
| BLi                | OH <sub>s</sub>                      | 3461                                            | 3461                                                        | 78                                  | 0                                                                                        |
| BGi                | OH <sub>as</sub>                     | 3497                                            | 3493                                                        | 609                                 | -4                                                                                       |
| BGi                | OH <sub>s</sub>                      | 3453                                            | 3449                                                        | 82                                  | -4                                                                                       |
| CLa                | OH <sub>C</sub>                      | 3497                                            | 3492                                                        | 398                                 | -5                                                                                       |
| CGa                | OH <sub>C</sub>                      | 3509                                            | 3505                                                        | 363                                 | -4                                                                                       |
| CGi                | OH <sub>as</sub>                     | 3498                                            | 3495                                                        | 591                                 | -3                                                                                       |
| CGi                | OH <sub>s</sub>                      | 3452                                            | 3451                                                        | 82                                  | -1                                                                                       |
| system             | label<br>(mode)                      |                                                 |                                                             |                                     |                                                                                          |
| PL <sup>S4</sup>   | i (OH <sub>P</sub> )                 | 3382                                            | 3379                                                        | 634                                 | -3                                                                                       |
| PL <sup>S4</sup>   | i (OH <sub>L</sub> )                 | 3516                                            | 3522                                                        | 561                                 | +6                                                                                       |
| PL <sup>S4</sup>   | a (OH <sub>P</sub> )                 | 3453                                            | 3462                                                        | 521                                 | +9                                                                                       |
| PL <sup>S4</sup>   | a (OH <sub>L</sub> )                 | 3530                                            | 3574                                                        | 65                                  | +44                                                                                      |
| NL <sup>S5</sup>   | SR <sub>1,A</sub> (OH <sub>N</sub> ) | 3490                                            | 3489                                                        | 460                                 | -1                                                                                       |
| NL <sup>S5</sup>   | SR <sub>1,A</sub> (OH <sub>L</sub> ) | 3525                                            | 3550                                                        | 70                                  | +25                                                                                      |
| NG <sup>S5</sup>   | (OH <sub>N</sub> )                   | 3501                                            | 3500                                                        | 410                                 | -1                                                                                       |
| NG <sup>S5</sup>   | (OH <sub>G</sub> )                   | 3525                                            | 3552                                                        | 60                                  | +27                                                                                      |
| ML <sup>S6</sup>   | 1-Ia (OH <sub>M</sub> )              | 3518                                            | 3496                                                        | 728                                 | -22                                                                                      |
| ML <sup>S6</sup>   | 1-Ib (OH <sub>L</sub> )              | 3413                                            | 3396                                                        | 330                                 | -17                                                                                      |
| MG <sup>S6</sup>   | 0-Ia (OH <sub>M</sub> )              | 3537                                            | 3512                                                        | 658                                 | -25                                                                                      |
| MG <sup>S6</sup>   | 0-Ib (OH <sub>G</sub> )              | 3413                                            | 3383                                                        | 454                                 | -30                                                                                      |

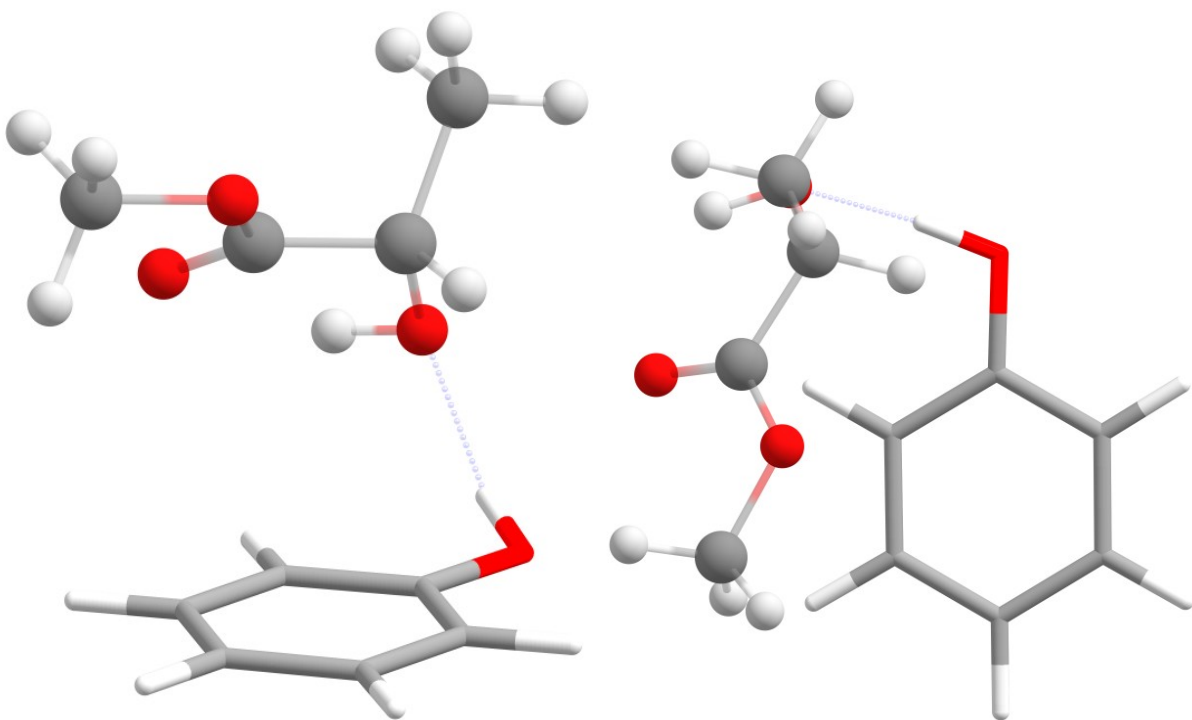

**Fig. S3:** Optimized structure of the associated PL dimer (a) which was analyzed with regard to the performance of the uniformly scaled B3LYP-D3 method.

## Experimental results

**Table S3:** Roughly estimated relative abundances of all species that can be observed in the BL spectra, determined from the ratio of the calculated intensities (IR: band strengths, Raman: scattering cross sections) and the experimental band integrals. The abundance of B was normalized to 1. <sup>a</sup> It was assumed that all LL bands are caused by a single L dimer. The calculated IR band strength (1040 km/mol) was therefore spread over all individual contributions based on the ratio of the experimental band integrals from a pure L spectrum. Furthermore, only one third of the integral values determined from the mixed BL spectrum were used to calculate the abundances in these cases, in order to allow for possible spectral overlaps with other species. <sup>b</sup> In the IR spectrum, the BB band at 3514 cm<sup>-1</sup> probably overlaps with an additional LL band at 3515 cm<sup>-1</sup>. To take this into account, the integral of this LL band was estimated from the visible LL bands and the integral ratio from the pure L spectrum. One third of the value obtained was subtracted from the BB 3514 integral before the abundance was calculated. The uncertainty of this procedure is indicated by specifying the BB 3514 abundance as an upper limit.

| IR/Raman                                                                   | Label    | Calculated IR band strength<br>(km/mol) | Abundance          |
|----------------------------------------------------------------------------|----------|-----------------------------------------|--------------------|
| IR                                                                         | B 3647   | 21                                      | 1                  |
| IR                                                                         | BB' 3598 | 406                                     | 0.01               |
| IR                                                                         | BB 3582  | 124                                     | 0.08               |
| IR                                                                         | L 3565   | 83                                      | 0.42               |
| IR                                                                         | LL 3543  | 155 <sup>a</sup>                        | <0.01              |
| IR                                                                         | LL 3529  | 185 <sup>a</sup>                        | 0.01               |
| IR                                                                         | BB 3514  | 239                                     | <0.04 <sup>b</sup> |
| IR                                                                         | BLa 3503 | 406                                     | 0.07               |
| IR                                                                         | LL 3496  | 185 <sup>a</sup>                        | 0.01               |
| Raman scattering cross section /<br>(10 <sup>-34</sup> m <sup>2</sup> /sr) |          |                                         |                    |
| Raman                                                                      | B 3647   | 0.61                                    | 1                  |
| Raman                                                                      | BB' 3594 | 2.53                                    | <0.01              |
| Raman                                                                      | BB 3582  | 0.74                                    | 0.07               |
| Raman                                                                      | L 3565   | 0.46                                    | 1.60               |
| Raman                                                                      | BB 3514  | 0.75                                    | 0.19               |
| Raman                                                                      | BLa 3503 | 0.80                                    | 0.49               |
| Raman                                                                      | BLi 3461 | 1.35                                    | 0.15               |

**Table S4:** Roughly estimated relative abundances of all species that can be observed in the BG spectra, determined from the ratio of the calculated intensities (IR: band strengths, Raman: scattering cross sections) and the experimental band integrals. The abundance of B was normalized to 1. <sup>a</sup> It is unclear which GG structure causes the band at 3547 cm<sup>-1</sup>. However, the integral ratio of GG 3547 and GG 3512 fits very well with that in pure G spectra. The same abundance is therefore assumed for both bands. <sup>b</sup> In the IR spectrum, the GG band at 3512 cm<sup>-1</sup> probably overlaps with the BB band at 3514 cm<sup>-1</sup>. It is known from the mixed BL spectrum as well as pure B spectra that the BB bands at 3514 cm<sup>-1</sup> and 3582 cm<sup>-1</sup> have a very similar intensity. To calculate the abundance of GG 3512 adjusted for the overlap, half of the BB 3582 integral was subtracted from the GG 3512 integral. The uncertainty of this procedure is indicated by specifying the GG 3512 abundance as an upper limit.

| IR/Raman                                                                   | Label    | Calculated IR band strength<br>(km/mol) | Abundance          |
|----------------------------------------------------------------------------|----------|-----------------------------------------|--------------------|
| IR                                                                         | B 3647   | 21                                      | 1                  |
| IR                                                                         | BB' 3598 | 406                                     | 0.01               |
| IR                                                                         | BB 3582  | 124                                     | 0.07               |
| IR                                                                         | G 3570   | 74                                      | 0.70               |
| IR                                                                         | GG 3547  |                                         | <0.03 <sup>a</sup> |
| IR                                                                         | GG 3512  | 987                                     | <0.03 <sup>b</sup> |
| IR                                                                         | BGi 3497 | 609                                     | 0.03               |
| Raman scattering cross section /<br>(10 <sup>-34</sup> m <sup>2</sup> /sr) |          |                                         |                    |
| Raman                                                                      | B 3647   | 0.61                                    | 1                  |
| Raman                                                                      | BB' 3594 | 2.53                                    | 0.01               |
| Raman                                                                      | BB 3582  | 0.74                                    | 0.07               |
| Raman                                                                      | G 3570   | 0.42                                    | 1.20               |
| Raman                                                                      | BB 3514  | 0.75                                    | 0.16               |
| Raman                                                                      | GG 3496  | 2.31                                    | 0.02               |
| Raman                                                                      | BGi 3453 | 1.05                                    | 0.22               |



**Table S5:** Roughly estimated relative abundances of all species that can be observed in the CL spectra, determined from the ratio of the calculated intensities (IR: band strengths, Raman: scattering cross sections) and the experimental band integrals. The abundance of C was normalized to 1.

| IR/Raman                                                             | Label    | Calculated IR band strength<br>(km/mol) | Abundance |
|----------------------------------------------------------------------|----------|-----------------------------------------|-----------|
| IR                                                                   | C 3648   | 23                                      | 1         |
| IR                                                                   | CC 3576  | 138                                     | 0.07      |
| IR                                                                   | L 3565   | 83                                      | 0.23      |
| IR                                                                   | CC 3507  | 242                                     | 0.05      |
| IR                                                                   | CLa 3497 | 398                                     | 0.04      |
| Raman scattering cross section /<br>( $10^{-34}$ m <sup>2</sup> /sr) |          |                                         |           |
| Raman                                                                | C 3648   | 0.63                                    | 1         |
| Raman                                                                | CC 3576  | 0.79                                    | 0.05      |
| Raman                                                                | L 3565   | 0.46                                    | 1.03      |
| Raman                                                                | CC 3507  | 0.75                                    | 0.10      |
| Raman                                                                | CLa 3497 | 0.90                                    | 0.27      |

**Table S6:** Roughly estimated relative abundances of all species that can be observed in the CG spectra, determined from the ratio of the calculated intensities (IR: band strengths, Raman: scattering cross sections) and the experimental band integrals. The abundance of C was normalized to 1. <sup>a</sup> In order to be able to determine abundances despite the overlap of CC 3576 and G 3570 as well as GG 3512 and CGa 3509, the entire integral over both bands was first calculated in both cases. It was then distributed among the two species in a ratio of 1:2 (CC 3576:G 3570, GG 3512: CGa3509). <sup>b</sup> It is unclear which GG structure causes the band at 3547 cm<sup>-1</sup>. However, the integral ratio of GG 3547 and GG 3512 fits very well with that in pure G spectra. The same abundance is therefore assumed for both bands. <sup>c</sup> In both the IR and Raman spectrum, the CGa band at 3509 cm<sup>-1</sup> probably overlaps with the CC band at 3507 cm<sup>-1</sup>. It is known from the mixed CL spectrum as well as pure C spectra that the CC bands at 3507 cm<sup>-1</sup> and 3576 cm<sup>-1</sup> have a very similar intensity. To calculate the abundance of CGa 3509 adjusted for the overlap, half of the CC 3576 integral was subtracted from the CGa 3509 integral. The uncertainty of this procedure is indicated by specifying the CGa 3509 abundance as an upper limit.

| IR/Raman                                                                        | Label    | Calculated IR band strength<br>(km/mol) | Abundance             |
|---------------------------------------------------------------------------------|----------|-----------------------------------------|-----------------------|
| IR                                                                              | C 3648   | 23                                      | 1                     |
| IR                                                                              | CC 3576  | 138                                     | 0.15 <sup>a</sup>     |
| IR                                                                              | G 3570   | 74                                      | 0.57 <sup>a</sup>     |
| IR                                                                              | GG 3547  |                                         | 0.02 <sup>b</sup>     |
| IR                                                                              | GG 3512  | 987                                     | 0.02 <sup>a</sup>     |
| IR                                                                              | CGa 3509 | 363                                     | <0.07 <sup>a, c</sup> |
| IR                                                                              | CGi 3498 | 591                                     | 0.02                  |
| <b>Raman scattering cross section /<br/>(10<sup>-34</sup> m<sup>2</sup>/sr)</b> |          |                                         |                       |
| Raman                                                                           | C 3648   | 0.63                                    | 1                     |
| Raman                                                                           | CC 3576  | 0.79                                    | 0.06                  |
| Raman                                                                           | G 3570   | 0.42                                    | 1.23                  |
| Raman                                                                           | CGa 3509 | 0.98                                    | <0.28 <sup>c</sup>    |
| Raman                                                                           | GG 3496  | 2.31                                    | 0.04                  |
| Raman                                                                           | CGi 3452 | 1.24                                    | 0.04                  |

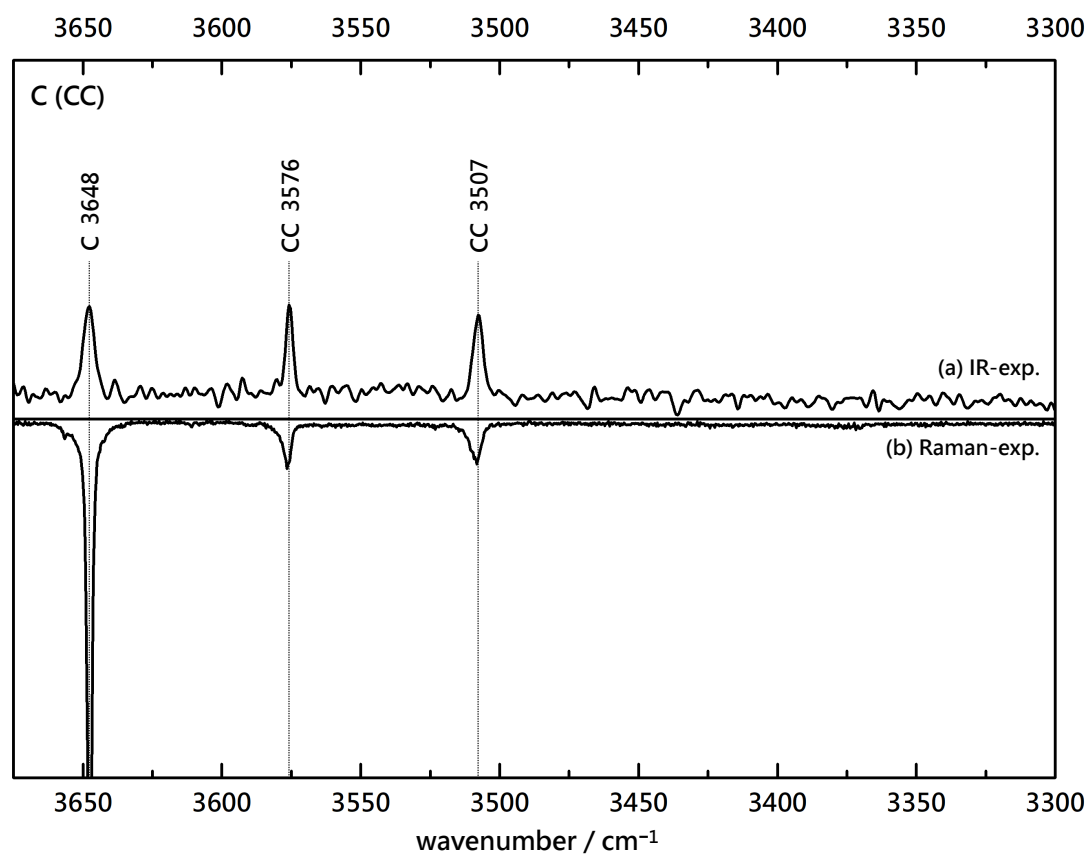

**Fig. S4:** Comparison of experimental IR (upwards) and Raman (downwards) spectra of (4-)C(hlorobenzyl alcohol) expansions with He. Dotted lines represent contributions from monomer C and dimer CC as marked with their wavenumbers.

---

## References

- (S1) Neese, F. Software update: the ORCA program system, version 4.0. *Wiley Interdiscip. Rev. Comput. Mol. Sci.* **2018**, 8, e1327.
- (S2) TURBOMOLE V7.3 2018, a development of University of Karlsruhe and Forschungszentrum Karlsruhe GmbH, 1989-2007, TURBOMOLE GmbH, since 2007; available from <http://www.turbomole.com>.
- (S3) Furche, F.; Ahlrichs, R.; Hättig, C.; Klopper, W.; Sierka, M.; Weigend, F. Turbomole. *Wiley Interdiscip. Rev. Comput. Mol. Sci.* **2014**, 4, 91–100.
- (S4) Hong, A.; Moon, C. J.; Jang, H.; Min, A.; Choi, M. Y.; Heo, J.; Kim, N. J. Isomer-Specific Induced Circular Dichroism Spectroscopy of Jet-Cooled Phenol Complexes with (–)-Methyl l-Lactate. *J. Phys. Chem. Lett.* **2018**, 9, 476–480.
- (S5) Seurre, N.; Le Barbu-Debus, K.; Lahmani, F.; Zehnacker, A.; Borho, N.; Suhm, M. A. Chiral recognition between lactic acid derivatives and an aromatic alcohol in a supersonic expansion: electronic and vibrational spectroscopy. *Phys. Chem. Chem. Phys.* **2006**, 8, 1007–1016.
- (S6) Borho, N.; Suhm, M. A.; Le Barbu-Debus, K.; Zehnacker, A. Intra- vs. intermolecular hydrogen bonding: dimers of alpha-hydroxyesters with methanol. *Phys. Chem. Chem. Phys.* **2006**, 8, 4449–4460.
